# Supplementary material for: Cu(triNHC)-catalyzed polymerization of glycidol to produce ultralow-branched polyglycerol
Source: Royal Society of Chemistry journal article supplement (doi:10.1039/d3ra04422j), 2023-01-01
Supplement: d3ra04422j1.pdf [file d3ra04422j1.pdf]

*Electronic Supplementary Information for*

**Cu(triNHC)-Catalyzed Polymerization of Glycidol to Produce Ultralow-Branched Polyglycerol**

*Kihyuk Sung,<sup>a</sup> Jinsu Baek,<sup>b</sup> Soonyoung Choi,<sup>c</sup> Byeong-Su Kim<sup>b</sup>, Sang-Ho Lee,<sup>c</sup> In-Hwan Lee,<sup>d,\*</sup> Hye-Young Jang<sup>a,\*</sup>*

<sup>a</sup> Department of Energy Systems Research, Ajou University, Suwon 16499, Korea

<sup>b</sup> Department of Chemistry, Yonsei University, Seoul 03722, Korea

<sup>c</sup> Center for Advanced Specialty Chemicals, Korea Research Institute of Chemical Technology (KRICT), Ulsan 44412, Korea

<sup>d</sup> Department of Chemistry, Ajou University, Suwon 16499, Korea

E-mail addresses of corresponding authors: ilee@ajou.ac.kr, hyjang2@ajou.ac.kr

|       |                                                                                        |     |
|-------|----------------------------------------------------------------------------------------|-----|
| I.    | Experimental procedures .....                                                          | S2  |
| II.   | Additional polymerization data .....                                                   | S3  |
| III.  | MALDI-ToF spectra .....                                                                | S7  |
| IV.   | <sup>1</sup> H DOSY NMR spectra .....                                                  | S15 |
| V.    | SEC data of polyglycerol .....                                                         | S22 |
| VI.   | Inverse-gated <sup>13</sup> C NMR spectra of polyglycerol .....                        | S26 |
| VII.  | Thermal analysis of polyglycerol .....                                                 | S32 |
| VIII. | <sup>1</sup> H NMR and ESI-MS of the reaction mixture including copper catalysts ..... | S33 |

## I. Experimental procedures

**Materials.** Glycidol (96.0%), Cu(OTf)<sub>2</sub> (98.0%), 1,5,7-Triazabicyclo[4.4.0]dec-5-ene (98%), copper iodide (99.999%) were obtained from Sigma Aldrich. 1,3-Bis(2,6-diisopropylphenyl)imidazole-2-ylidene (98.0%) was obtained from Tokyo Chemical Industry. Toluene (99.9%) was sourced from Samchun Chemicals. Glycidol and toluene were dried with CaH<sub>2</sub> and distilled prior to use. Catalysts A and B were prepared as described in the previous literature.<sup>[1]</sup>

**Measurements.** Proton nuclear magnetic resonance (<sup>1</sup>H NMR) spectra were recorded with a Jeol Resonance ECZ600R (600 MHz) spectrometer. Chemical shifts are reported in delta (δ) units, parts per million (ppm) relative to the center of a peak at 2.50 ppm for DMSO-d<sub>6</sub>. Coupling constants are reported in Hertz (Hz). Carbon-13 nuclear magnetic resonance (<sup>13</sup>C NMR) spectra were recorded with a Jeol Resonance ECZ600R (150 MHz) spectrometer. Chemical shifts are reported in delta (δ) units, parts per million (ppm) relative to the center of a peak at 39.52 ppm for DMSO-d<sub>6</sub>. <sup>1</sup>H diffusion-ordered spectroscopy (DOSY) was recorded on a Bruker AVANCE III HD 300 spectrometer at 25 °C. All samples were dissolved in DMSO-d<sub>6</sub>. Matrix-assisted laser desorption/ionization time-of-flight (MALDI-ToF) measurement was performed using autoflex maX from Bruker. 2,5-Dihydroxybenzoic acid (DHB) was used as the matrix. For DMF-SEC, three polystyrene-gel columns [KD-802 (from Shodex); pore size, 150 Å; 8 mm i.d. × 300 mm, KD-803 (from Shodex); pore size, 500 Å; 8 mm i.d. × 300 mm, KD-804 (from Shodex); pore size, 1500 Å; 8 mm i.d. × 300 mm] were connected to a PU-4180 pump, an RI-4030 refractive-index detector, and a UV-4075 ultraviolet detector (JASCO); the flow rate was maintained at 1.0 mL min<sup>-1</sup>. The columns were calibrated against 13 standard poly(ethylene glycol) (PEO) samples (Agilent Technologies; Mp = 980–811 500; M<sub>w</sub>/M<sub>n</sub> = 1.03–1.11) to analyze the obtained polymer samples. Differential scanning calorimetry (DSC) was conducted on polymer samples under a dry nitrogen flow (40 ml/min) in the temperature range of -70~+70 °C at a heating or cooling rate of 10 °C/min on a Q2000 calorimeter (TA Instruments).

### General procedure for polymerization of glycidol

Glycidol (148.2 mg, 2 mmol), catalysts (21.2 mg, 2 mol%), and toluene (1.0 ml) were added to the reaction vial. The mixture was stirred at the indicated temperature for 16 h under the nitrogen atmosphere. Then, the reaction mixture was washed with diethyl ether to remove the unreacted monomer. The product was dried at 50 °C for 1 day before obtaining the yield and sample analysis.

### Procedure for catalyst recycling experiment

Glycidol (148.2 mg, 2 mmol), catalyst (21.2 mg, 2 mol%), and toluene (1.0 ml) were added to the reaction vial. The mixture was stirred at the indicated temperature for 16 h under the nitrogen atmosphere. After the reaction, glycidol (148.2 mg, 2 mmol) was added repeatedly in each cycle. Then, the reaction mixture was washed with diethyl ether to remove the unreacted monomer. The product was dried at 50 °C for 1 day before obtaining the yield and sample analysis.

---

<sup>1</sup> Seo, C.; Cheong, Y.-J.; Yoon, W.; Kim, J.; Shin, J.; Yun, H.; Kim, S.-J.; Jang, H.-Y.; Mononuclear Copper Complexes with Tridentate Tris(*N*-heterocyclic carbene): Synthesis and Catalysis of Alkyne-Azide Cycloaddition. *Organometallics* **2021**, *40*, 16-22

## II. Additional Polymerization Data

**Table S1.** Previously reported DB values without using unprotected glycidol

| catalyst             | initiator       | temp (°C) | time | DB   | ref |
|----------------------|-----------------|-----------|------|------|-----|
| Sn(OTf) <sub>2</sub> | isoamyl alcohol | 20        | 2.5h | 0.21 | 8   |
| Sn(OTf) <sub>2</sub> | isoamyl alcohol | 0         | 42h  | 0.20 | 8   |
| Sn(OTf) <sub>2</sub> | isoamyl alcohol | -20       | 96h  | 0.15 | 8   |
| PBS                  | --              | 80        | 72h  | 0.25 | 27  |
| DMC-DEM              | --              | 110       | 5h   | 0.27 | 25  |

PBS: phosphate buffered saline with pH = 6.0

DMC: double metal cyanide, DEM: diethyl malonate

**Table S2.** Solvent screening of glycidol polymerization

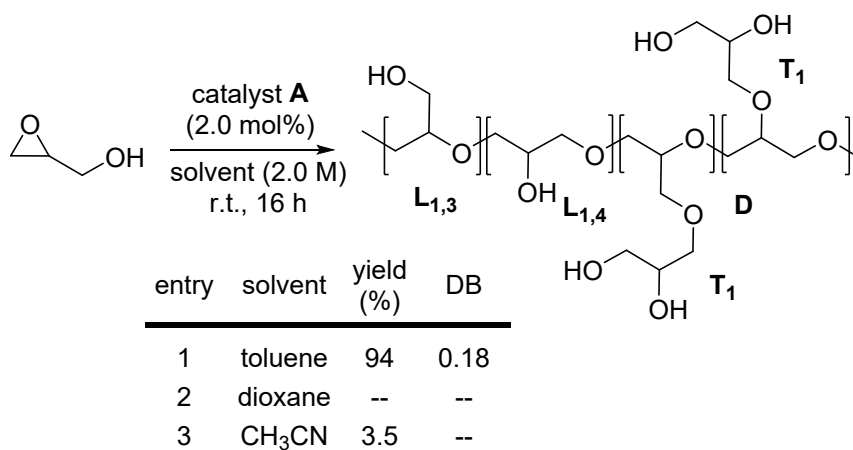

**Table S3.** Detailed unit distribution of polymers of Table 1

| Region                              | Chemical shift (ppm) | Entry 1 | Entry 2 | Entry 3 | Entry 4 | Entry 5 | Entry 8 | Entry 9 |
|-------------------------------------|----------------------|---------|---------|---------|---------|---------|---------|---------|
| T <sub>2</sub>                      | 82.5-83.0            | 0.032   | 0       | 0       | 0.25    | 0.16    | 0       | 0       |
| L <sub>1,3</sub>                    | 79.7-80.4            | 1.00    | 1.00    | 1.00    | 1.00    | 1.00    | 1.00    | 1.00    |
| D                                   | 77.7-78.3            | 0.29    | 0.085   | 0.14    | 1.05    | 1.57    | 1.62    | 1.11    |
| 2L <sub>1,4</sub>                   | 72.6-73.1            | 3.21    | 1.92    | 2.26    | 18.88   | 12.6    | 7.22    | 6.69    |
| 2D, 2T <sub>1</sub>                 | 70.4-72.0            | 2.98    | 1.70    | 2.21    | 15.27   | 12.83   | 9.35    | 8.61    |
| L <sub>1,3</sub> , L <sub>1,4</sub> | 68.5-69.7            | 2.00    | 1.66    | 1.74    | 8.27    | 7.01    | 4.05    | 3.30    |
| T <sub>1</sub>                      | 62.9-63.3            | 0.71    | 0.22    | 0.42    | 8.85    | 4.61    | 2.87    | 3.46    |
| 2T <sub>2</sub>                     | 61.2-61.8            | 0.055   | 0       | 0.00    | 1.11    | 0.89    | 0.17    | 0.14    |
| L <sub>1,3</sub>                    | 60.7-61.2            | 0.97    | 1.00    | 0.92    | 1.5     | 0.92    | 1.09    | 0.90    |
| .....                               |                      |         |         |         |         |         |         |         |
| Terminal (%)                        |                      | 20.4    | 9.7     | 15.6    | 44.2    | 35.0    | 32.2    | 39.3    |
| T <sub>1</sub> (%)                  |                      | 19.5    | 9.7     | 15.6    | 43.0    | 33.8    | 31.2    | 38.5    |
| T <sub>2</sub> (%)                  |                      | 0.9     | 0       | 0       | 1.2     | 1.2     | 0.9     | 0.8     |
| Dendritic (%)                       |                      | 8.0     | 3.8     | 5.2     | 5.1     | 11.5    | 17.6    | 12.4    |
| Linear (%)                          |                      | 71.6    | 86.5    | 79.2    | 50.7    | 53.5    | 50.2    | 48.4    |
| L <sub>1,3</sub> (%)                |                      | 27.5    | 44.1    | 37.2    | 4.9     | 7.3     | 10.9    | 11.1    |
| L <sub>1,4</sub> (%)                |                      | 44.1    | 42.4    | 42.0    | 45.8    | 46.2    | 39.3    | 37.2    |
| Degree of branching <sup>b</sup>    |                      | 0.18    | 0.08    | 0.12    | 0.17    | 0.30    | 0.41    | 0.34    |

<sup>a</sup> Obtained from inverse gated <sup>13</sup>C NMR.

<sup>b</sup> Degree of branching =  $\frac{2D}{2D + L}$

**Table S4.** Unit distribution of polymers obtained from recycling experiments

| Region                              | Chemical shift (ppm) | Cycle 1 | Cycle 2 | Cycle 3 |
|-------------------------------------|----------------------|---------|---------|---------|
| T <sub>2</sub>                      | 82.5-83.0            | 0.032   | 0       | 0.007   |
| L <sub>1,3</sub>                    | 79.7-80.4            | 1.00    | 1.00    | 1.00    |
| D                                   | 77.7-78.3            | 0.29    | 0.19    | 0.2     |
| 2L <sub>1,4</sub>                   | 72.6-73.1            | 3.21    | 2.04    | 1.99    |
| 2D, 2T <sub>1</sub>                 | 70.4-72.0            | 2.98    | 1.96    | 2.00    |
| L <sub>1,3</sub> , L <sub>1,4</sub> | 68.5-69.7            | 2.00    | 1.77    | 1.74    |
| T <sub>1</sub>                      | 62.9-63.3            | 0.71    | 0.25    | 0.42    |
| 2T <sub>2</sub>                     | 61.2-61.8            | 0.055   | 0       | 0.00    |
| L <sub>1,3</sub>                    | 60.7-61.2            | 0.97    | 1.02    | 0.92    |
| .....                               |                      |         |         |         |
| Terminal (%)                        |                      | 20.4    | 10.2    | 13.0    |
| T <sub>1</sub> (%)                  |                      | 19.5    | 10.2    | 12.7    |
| T <sub>2</sub> (%)                  |                      | 0.9     | 0       | 0.3     |
| Dendritic (%)                       |                      | 8.0     | 7.7     | 7.9     |
| Linear (%)                          |                      | 71.6    | 82.1    | 79.1    |
| L <sub>1,3</sub> (%)                |                      | 27.5    | 40.6    | 39.7    |
| L <sub>1,4</sub> (%)                |                      | 44.1    | 41.5    | 39.5    |
| Degree of branching <sup>b</sup>    |                      | 0.18    | 0.16    | 0.17    |

<sup>a</sup> Obtained from inverse gated <sup>13</sup>C NMR.

<sup>b</sup> Degree of branching =  $\frac{2D}{2D + L}$

**Table S5. Additional experimental results**

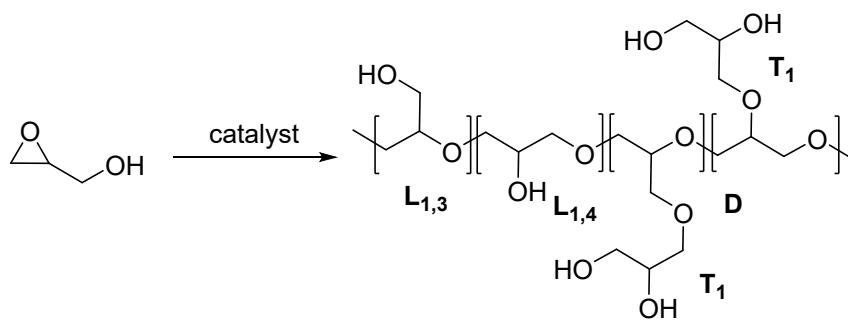

| entry | catalyst                  | temp. (°C) | time (h) | yield (%) | DB   | D    | L <sub>1,3</sub> /L <sub>1,4</sub> | T <sub>1</sub> |
|-------|---------------------------|------------|----------|-----------|------|------|------------------------------------|----------------|
| 1     | <b>A</b> (1 mol%)         | 25         | 16       | 65        | 0.13 | 6.2  | 39/41                              | 15             |
| 2     | <b>A</b> (4 mol%)         | 25         | 16       | 95        | 0.25 | 11.2 | 16/50                              | 23             |
| 3     | <b>B</b> (2 mol%)         | 0          | 48       | 90        | 0.14 | 6.7  | 42/41                              | 10             |
| 4     | CuI (2 mol%)/IPr (6 mol%) | 25         | 16       | 33        | 0.10 | 2.6  | 4.5/42                             | 51             |

### III. MALDI-ToF spectra

**Azide addition:** Ring-opening of glycidol monomer by sodium azide was conducted prior to the polymer examination. After the reaction, it was confirmed by  $^1\text{H}$  NMR that all monomers were ring-opened. Accordingly, topology examination of polymers was attempted using sodium azide. The reaction was conducted with polymers, sodium azide (5 equivalents to OH), and 2.5 M of deionized water at 25 °C for 16 hours under a nitrogen atmosphere.

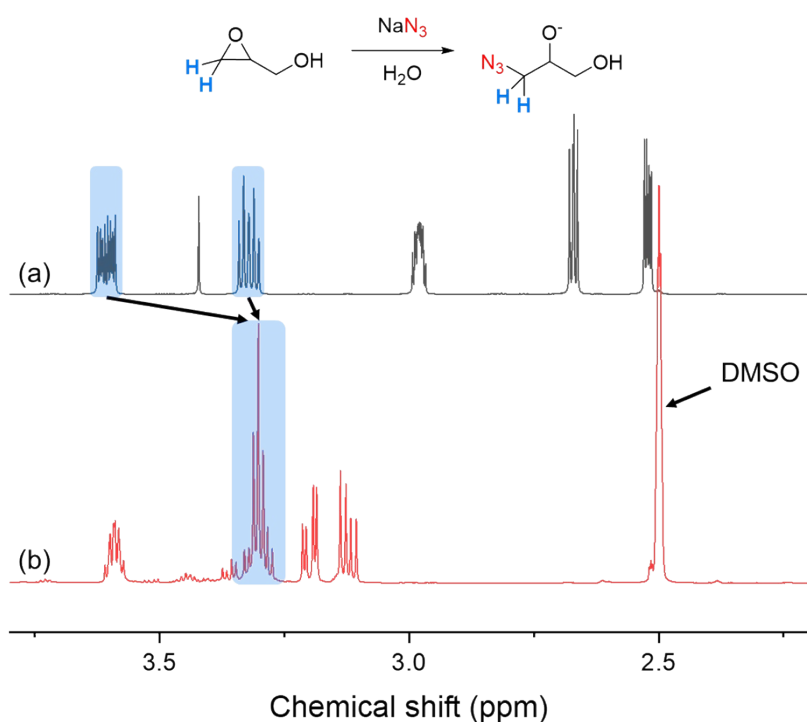

**Figure S1.** Ring-opening of glycidol by azide addition (a) glycidol, (b) ring-opened glycidol.

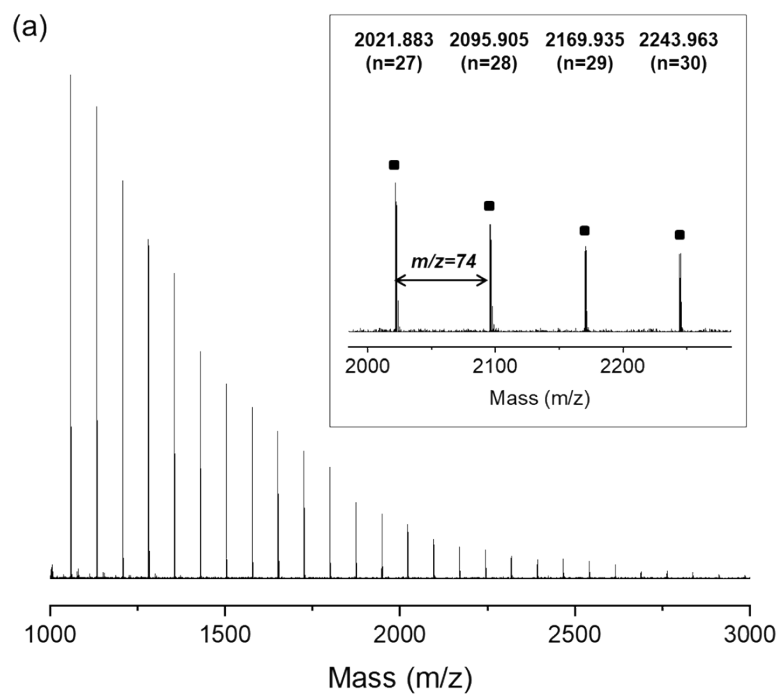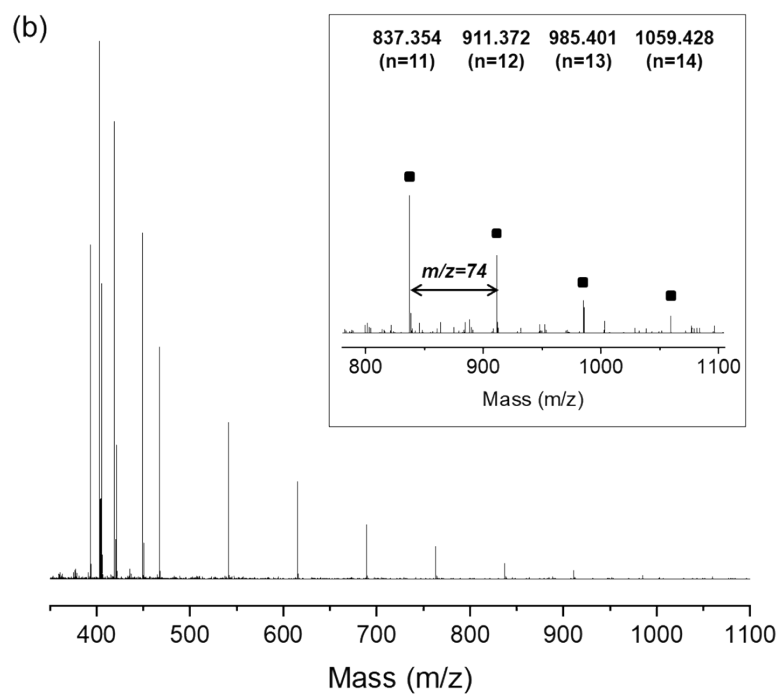

**Figure S2.** MALDI-ToF spectra of (a) polyglycerol (Table 1, Entry 1) (b) polyglycerol after  $N_3^-$  addition.



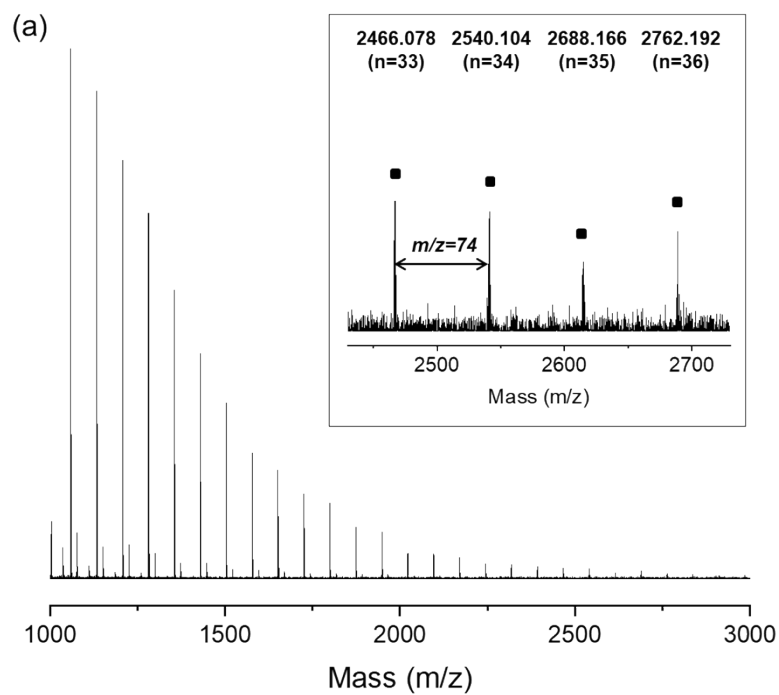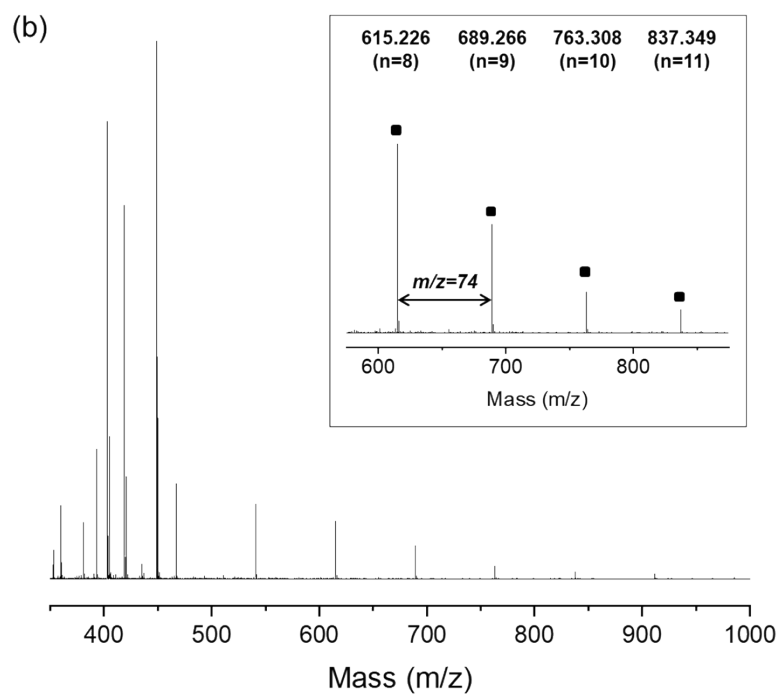

**Figure S3.** MALDI-ToF spectra of (a) polyglycerol (Table 1, Entry 2) (b) polyglycerol after  $N_3^-$  addition.

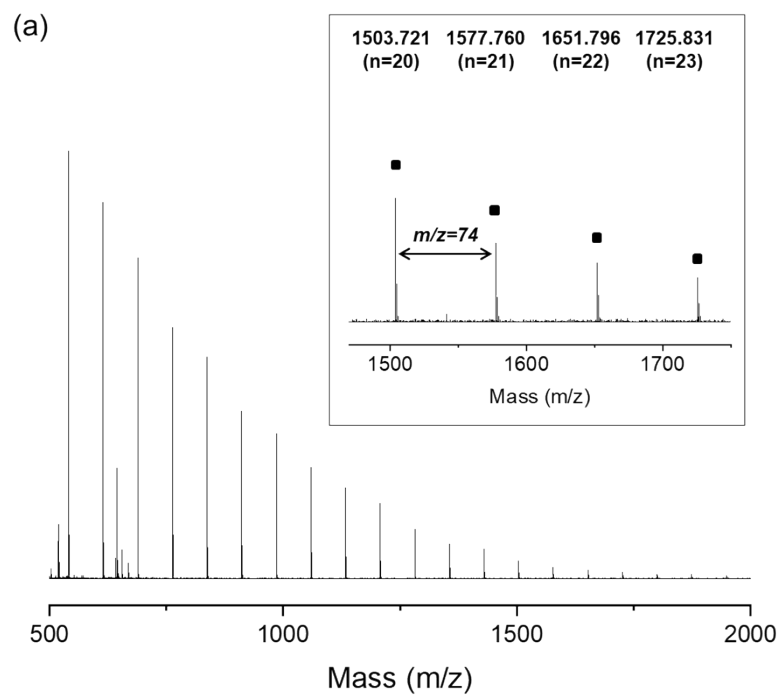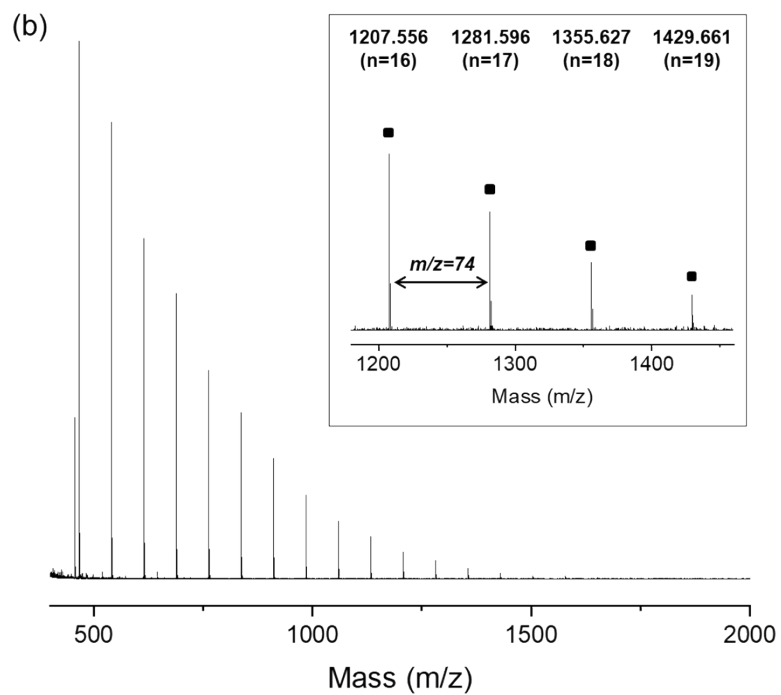

**Figure S4.** MALDI-ToF spectra of (a) polyglycerol (Table 1, Entry 3) (b) polyglycerol after  $N_3^-$  addition.

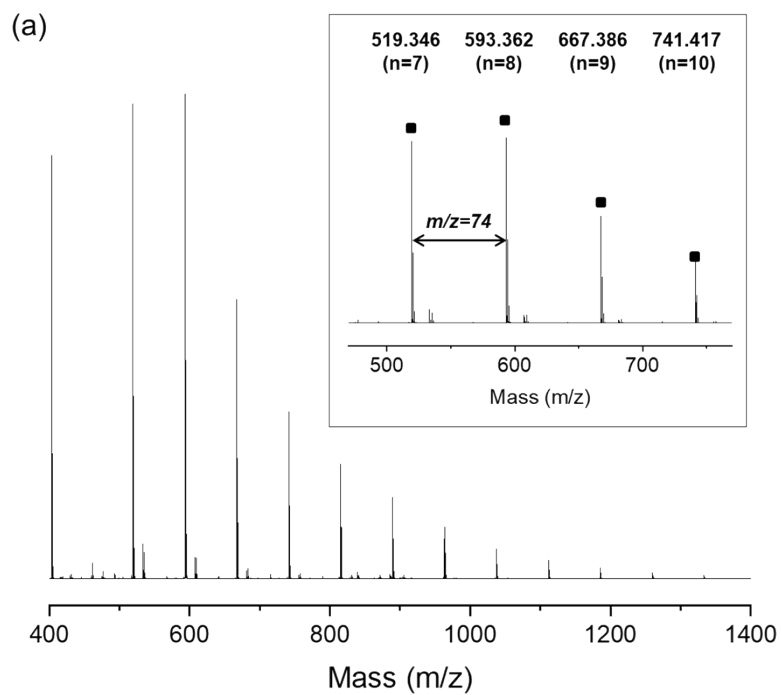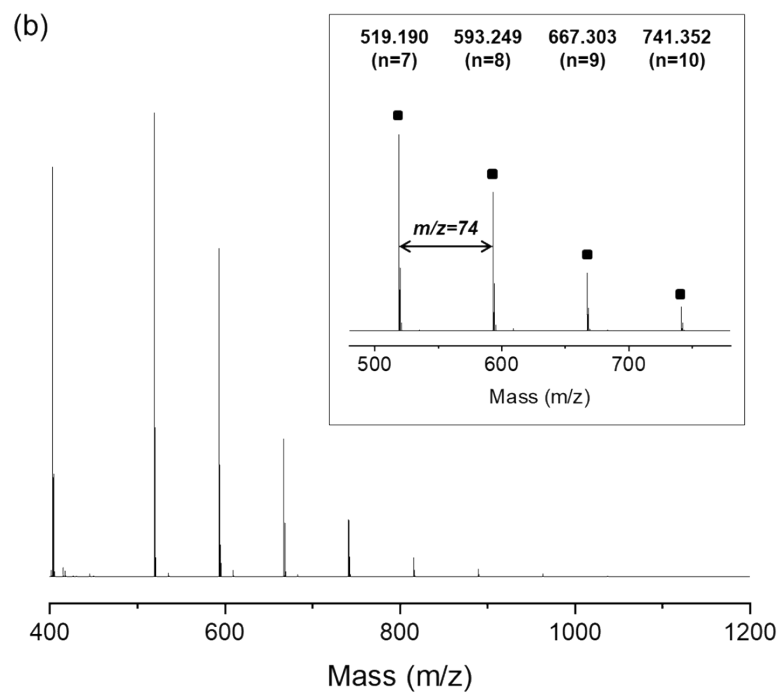

**Figure S5.** MALDI-ToF spectra of (a) polyglycerol (Table 1, Entry 4) (b) polyglycerol after  $N_3^-$  addition.

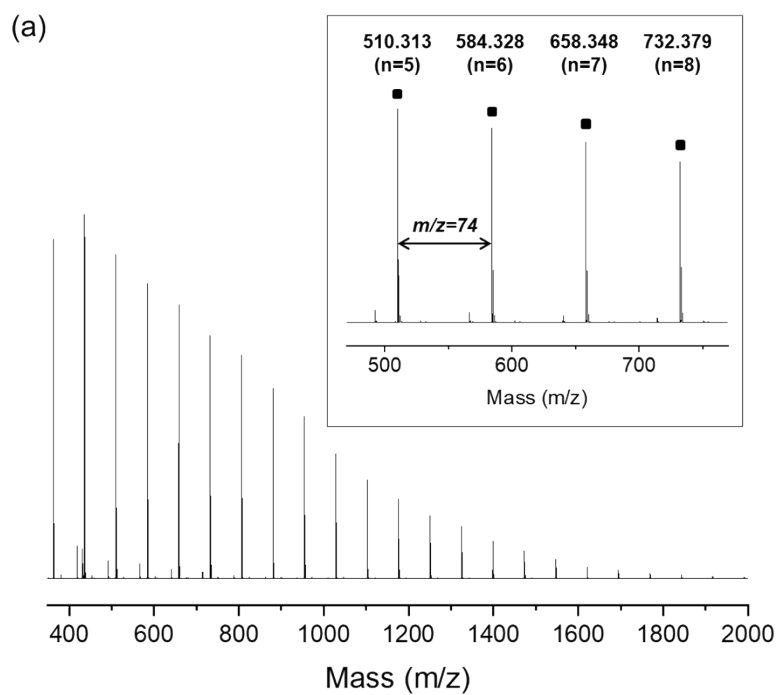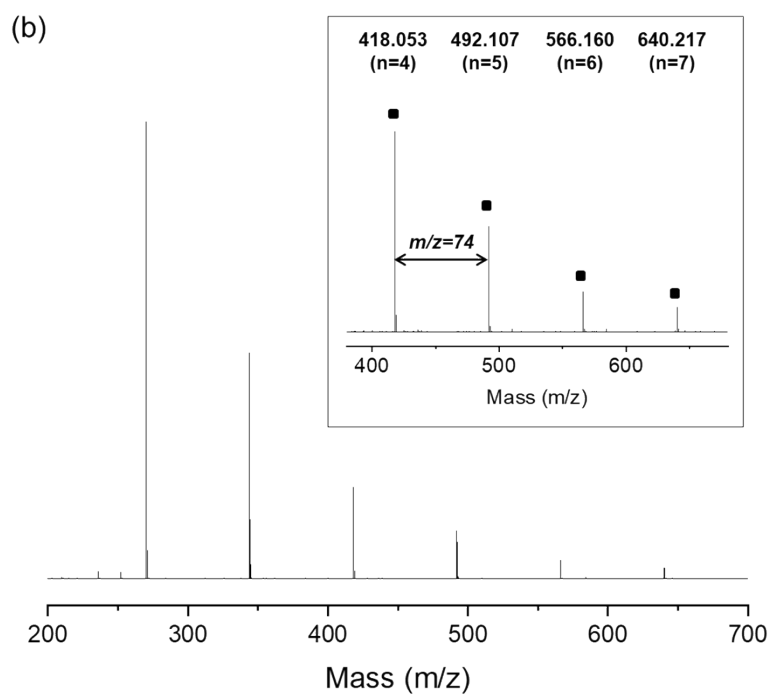

**Figure S6.** MALDI-ToF spectra of (a) polyglycerol (Table 1, Entry 5) (b) polyglycerol after  $N_3^-$  addition.

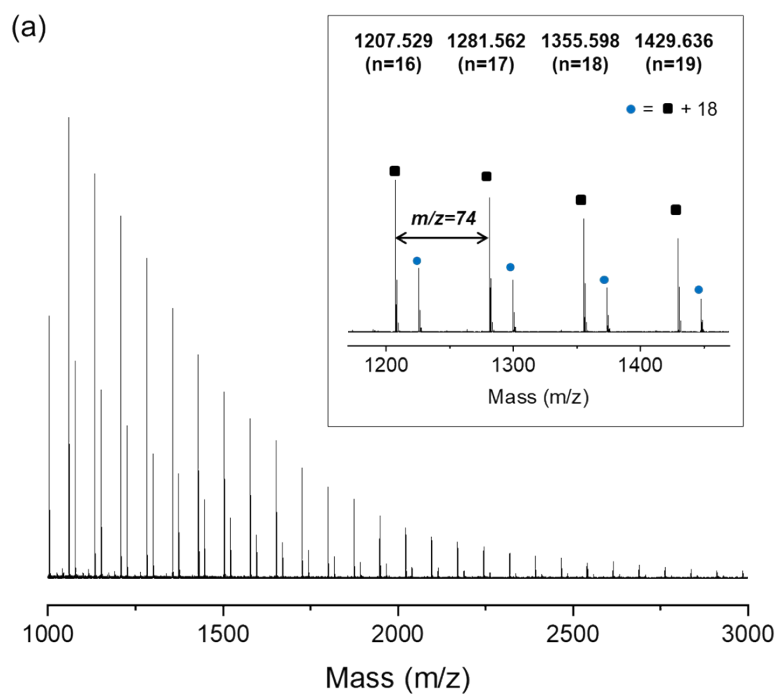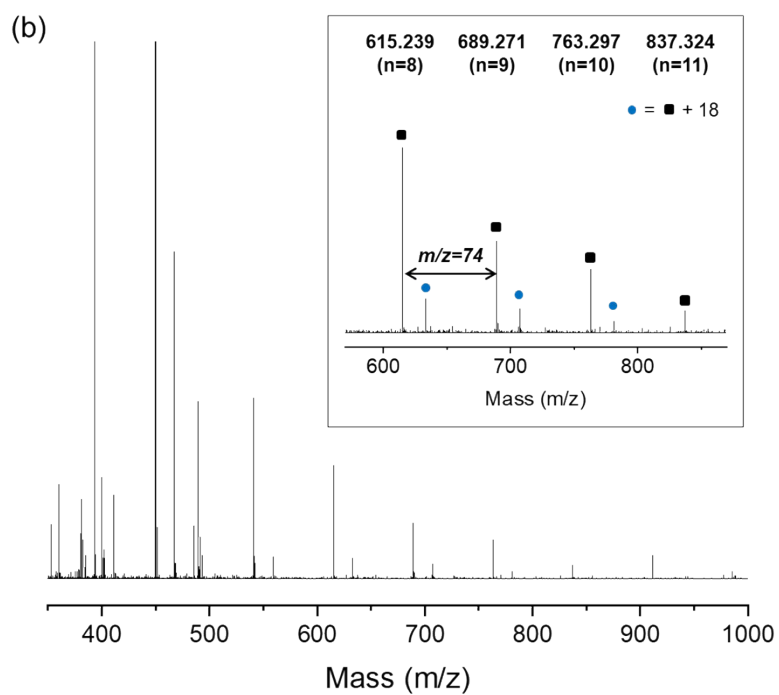

**Figure S7.** MALDI-ToF spectra of (a) polyglycerol (Table 1, Entry 8) (b) polyglycerol after  $N_3^-$  addition.

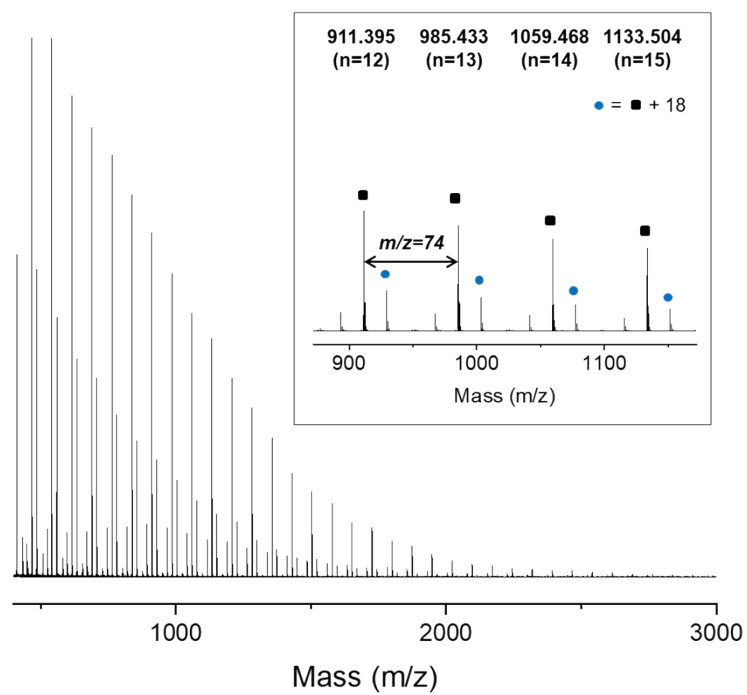

**Figure S8.** MALDI-ToF spectra of polyglycerol (Table 1, Entry 9).

#### IV. $^1\text{H}$ DOSY NMR spectra

**Measurement:** All  $^1\text{H}$  DOSY spectra were acquired with the bipolar gradient pulse sequence using double stimulated echo and 3 spoil gradients for the convection compensation (dstebppg3s). The time between pulses ( $\Delta$ ) was kept at 0.12 s, and the gradient length ( $\delta$ ) was set to 4 ms with the 5 ms of eddy current. MestReNova 12.0 was used for the processing of NMR data and the calculation of diffusion coefficient ( $D$ ).

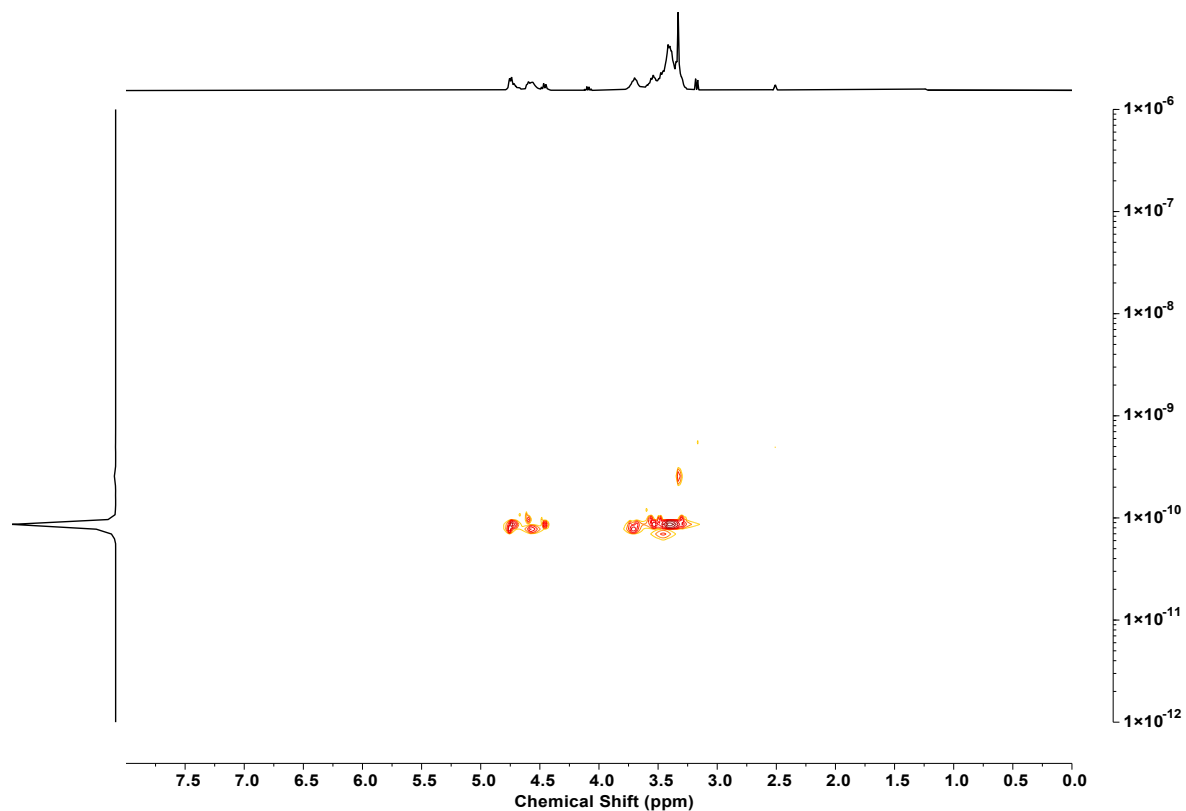

**Figure S9.**  $^1\text{H}$  DOSY spectrum of entry 1 (Table 1).

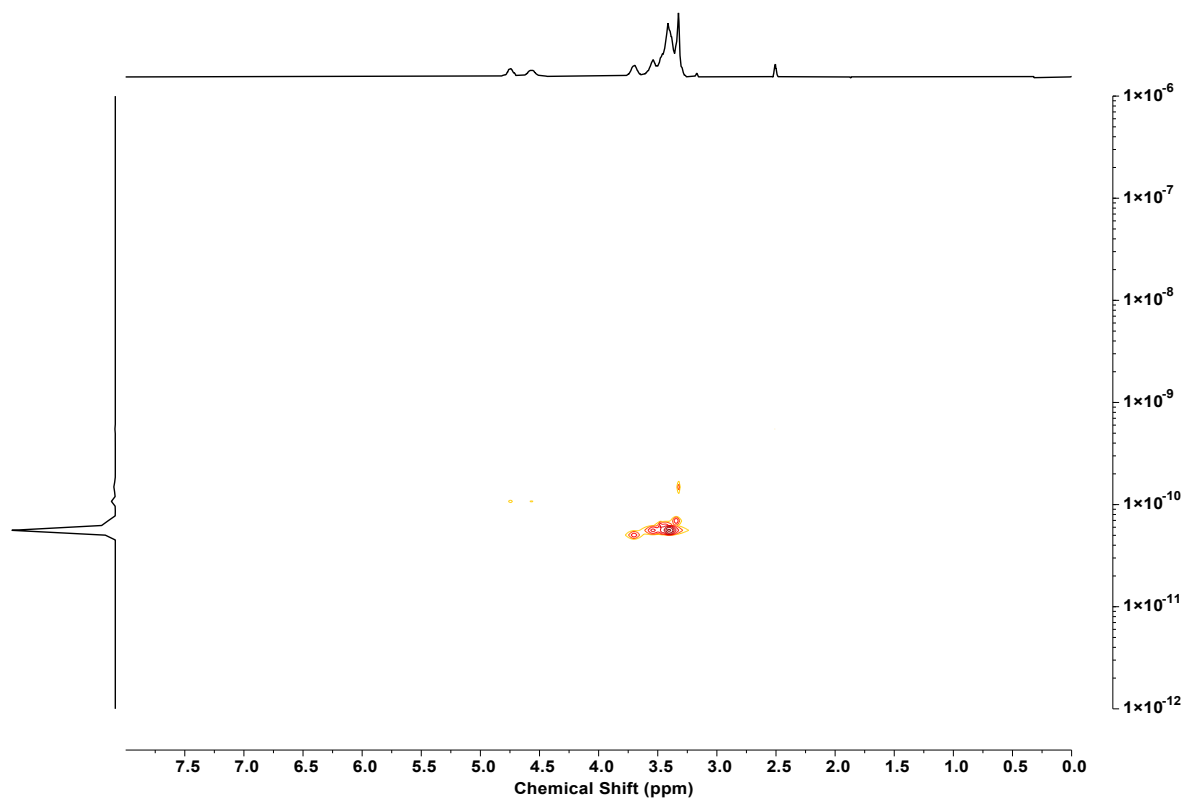

**Figure S10.** <sup>1</sup>H DOSY spectra of entry 2 (Table 1).



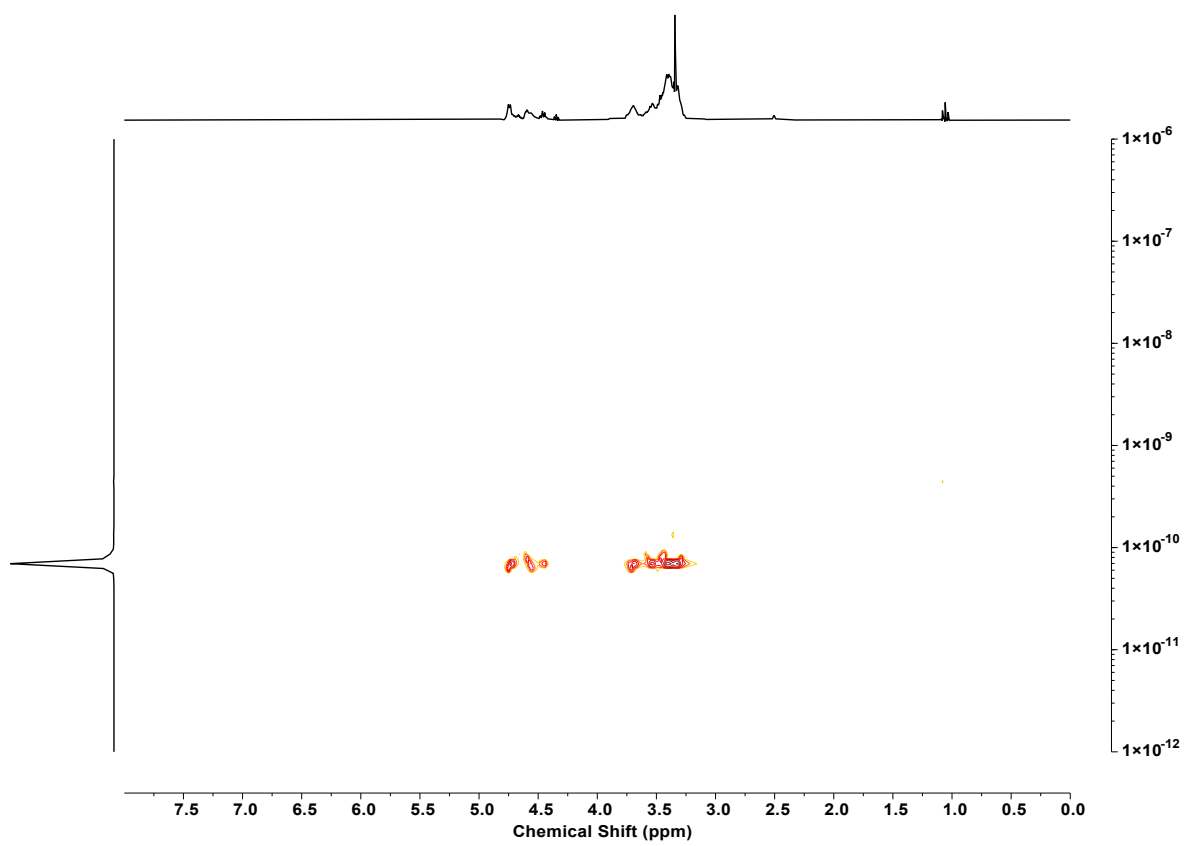

**Figure S11.** <sup>1</sup>H DOSY spectra of entry 3 (Table 1).

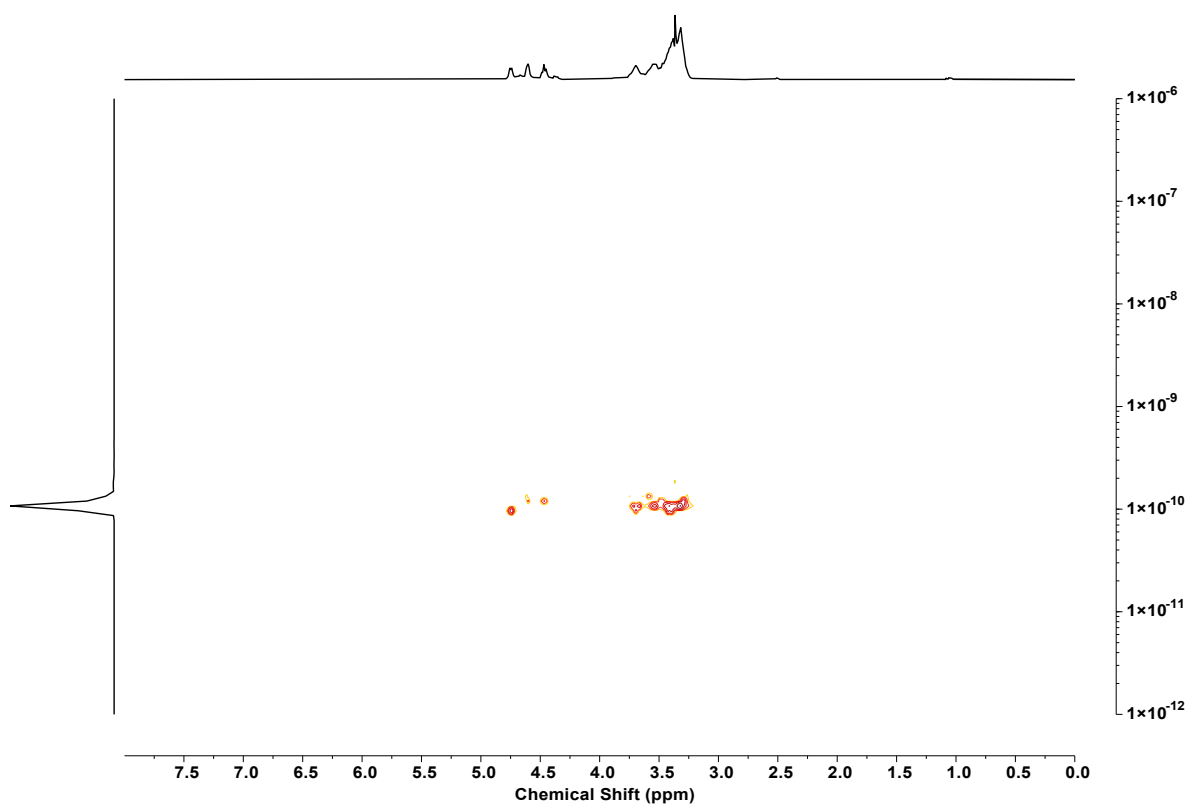

**Figure S12.**  $^1\text{H}$  DOSY spectra of entry 4 (Table 1).

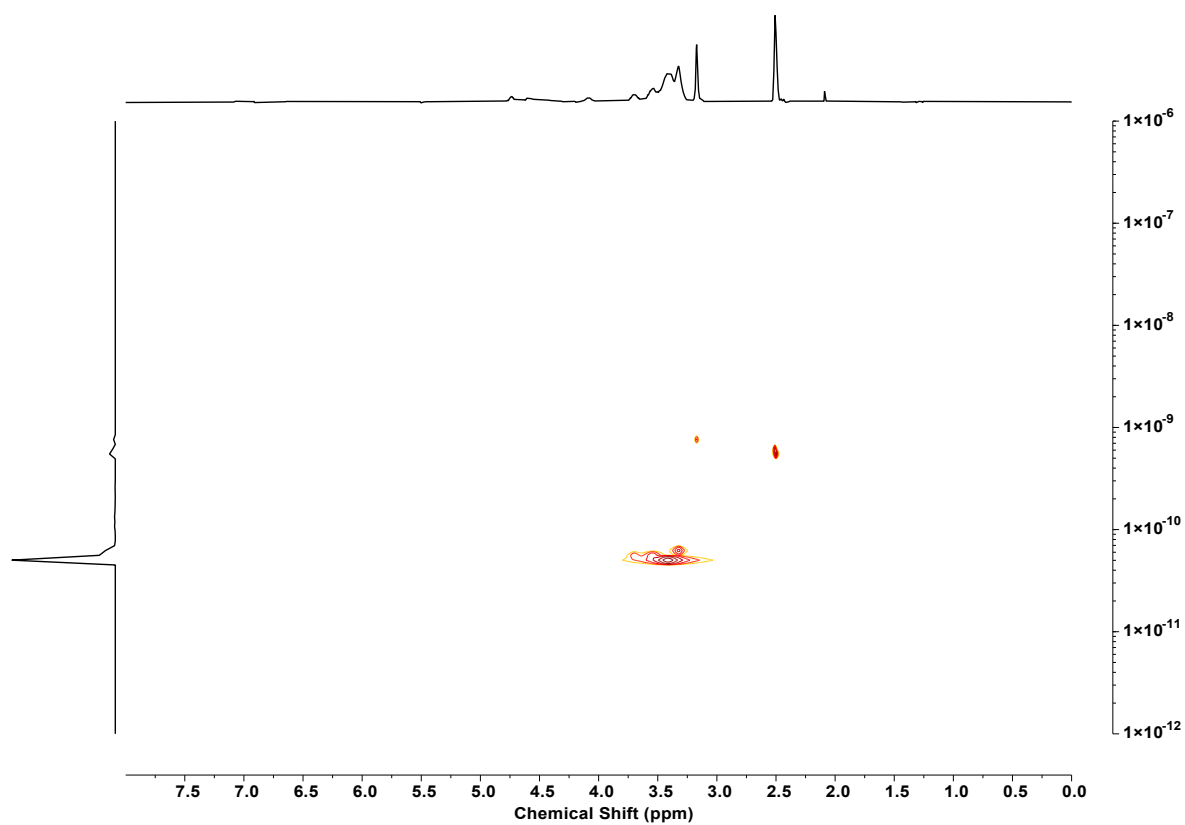

**Figure S13.** <sup>1</sup>H DOSY spectra of entry 5 (Table 1).

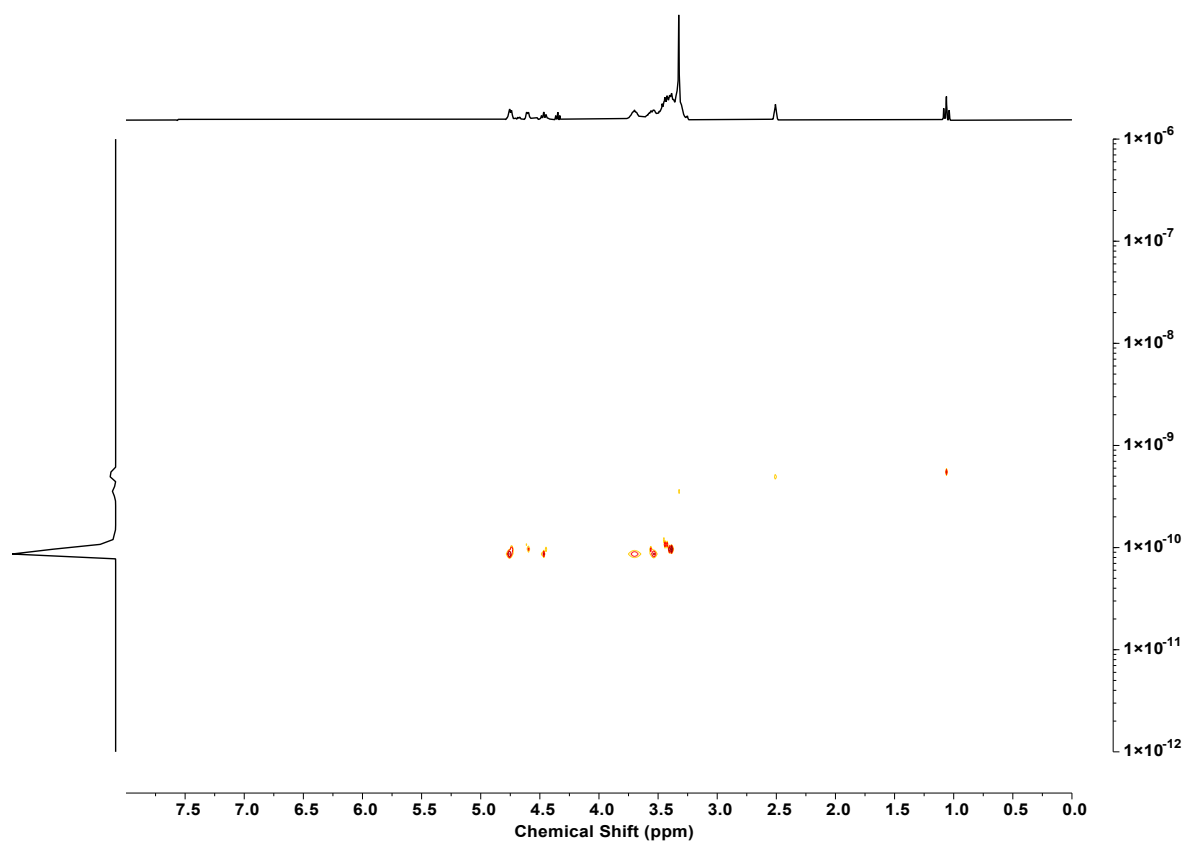

**Figure S14.**  $^1\text{H}$  DOSY spectra of entry 8 (Table 1).

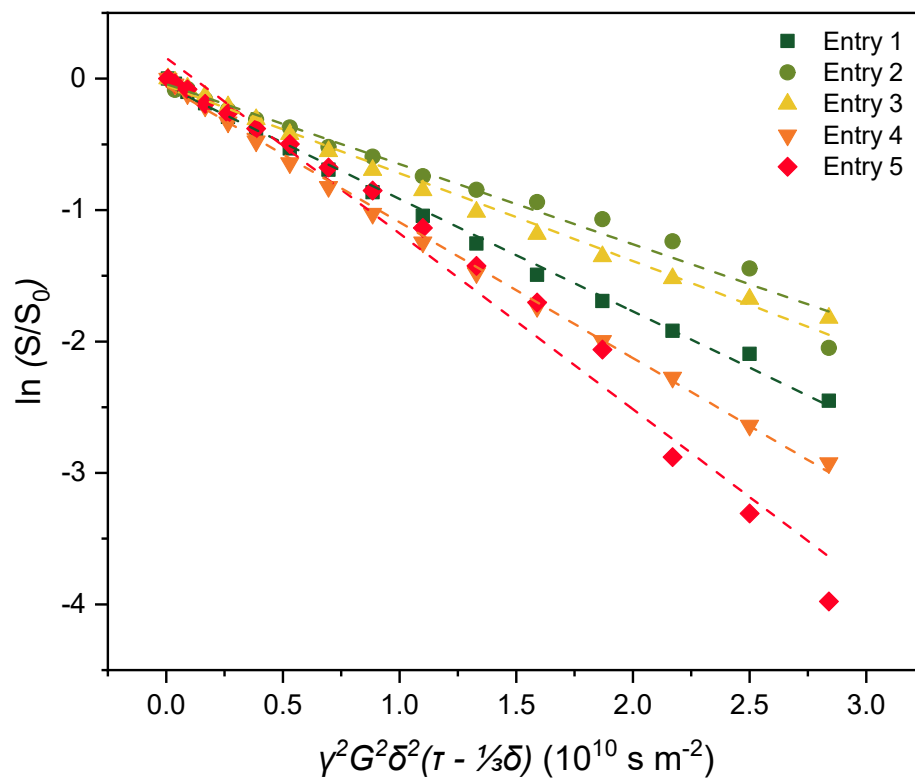

**Figure S15.** Stejskal-Tanner plot obtained from  $^1\text{H}$  DOSY NMR (Table 1).

## V. SEC data of polyglycerol

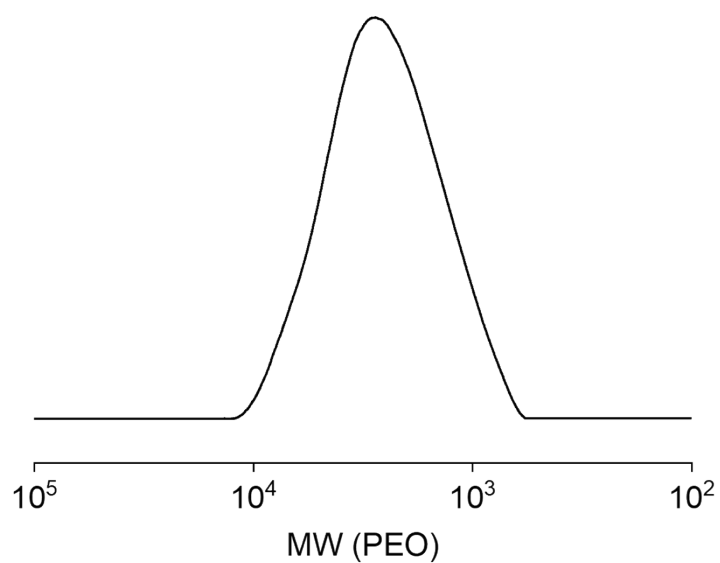

$M_n$ : 2190,  $M_w$ : 3000,  $D$ : 1.37

**Figure S16.** GPC traces of polyglycerol (Table 1, Entry 1).

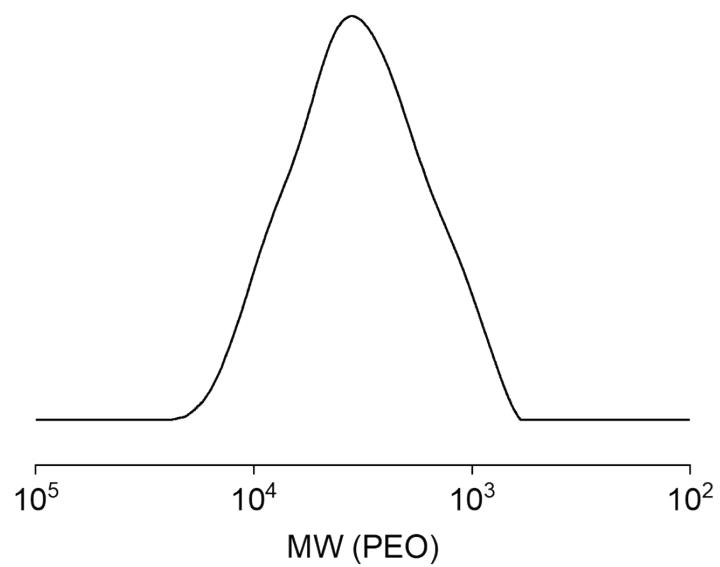

$M_n$ : 2670,  $M_w$ : 4220,  $D$ : 1.59

**Figure S17.** GPC traces of polyglycerol (Table 1, Entry 2).

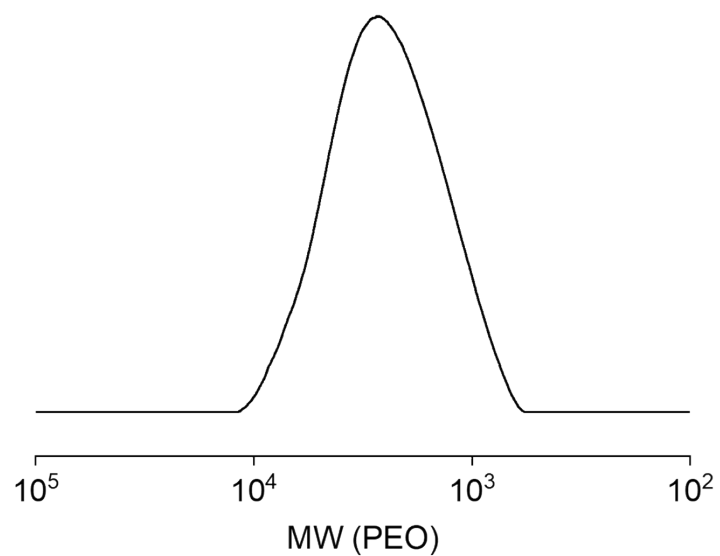

$M_n$ : 2160,  $M_w$ : 2930,  $D$ : 1.36

**Figure S18.** GPC traces of polyglycerol (Table 1, Entry 3).

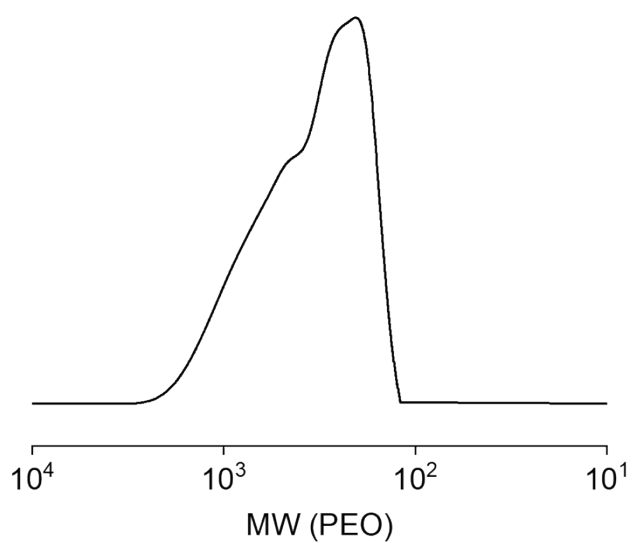

$M_n$ : 640,  $M_w$ : 740,  $D$ : 1.12

**Figure S19.** GPC traces of polyglycerol (Table 1, Entry 4).

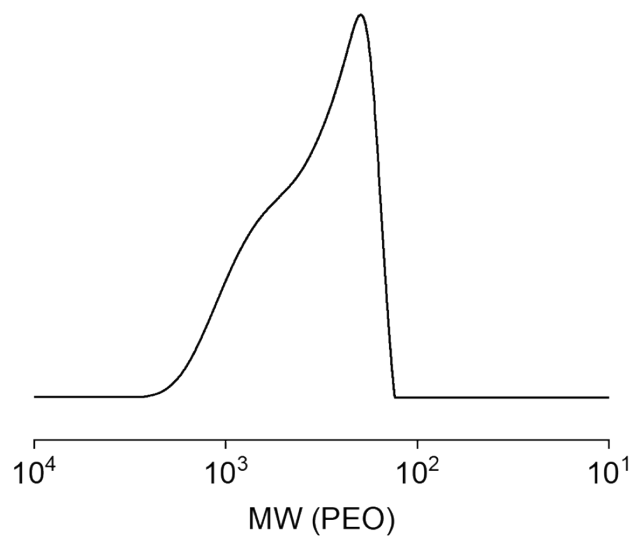

$M_n$ : 680,  $M_w$ : 780,  $D$ : 1.15

**Figure S20.** GPC traces of polyglycerol (Table 1, Entry 5).

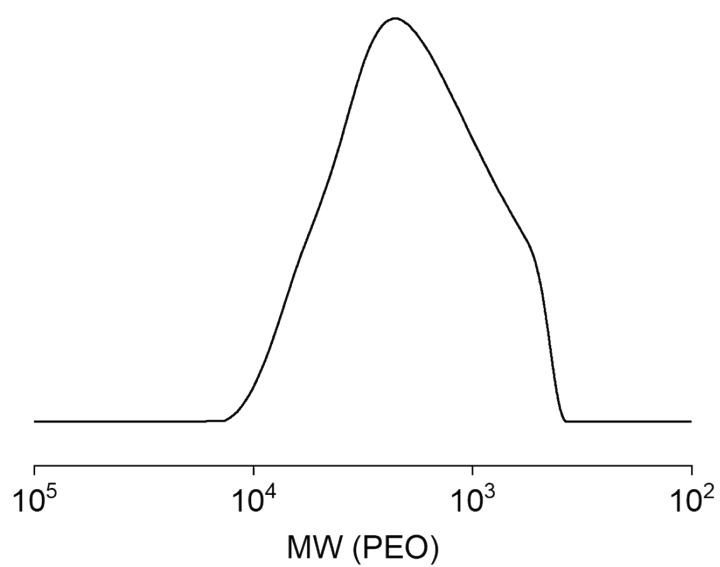

$M_n$ : 1500,  $M_w$ : 2530,  $D$ : 1.69

**Figure S21.** GPC traces of polyglycerol (Table 1, Entry 8).



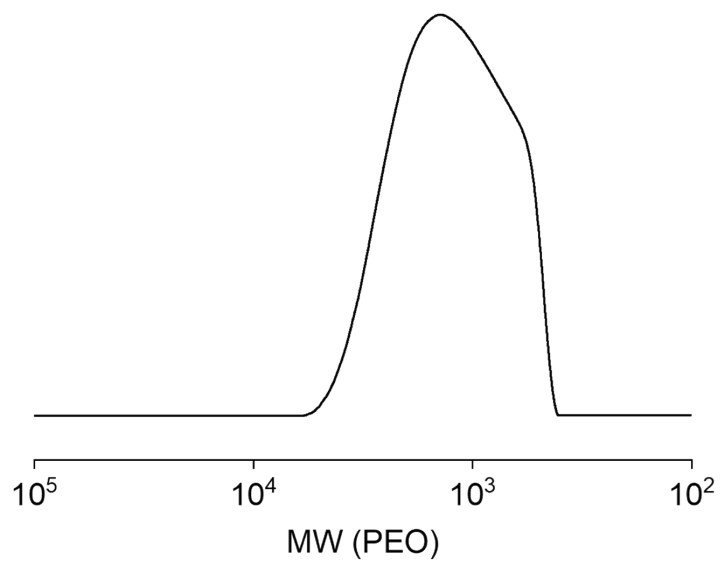

$M_n$ : 1100,  $M_w$ : 1470,  $D$ : 1.33

**Figure S22.** GPC traces of polyglycerol (Table 1, Entry 9).

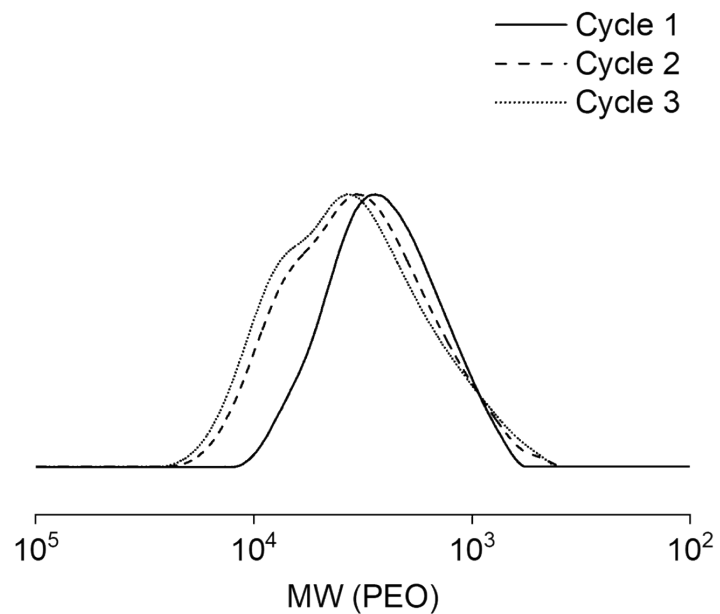

Cycle 2)  $M_n$ : 2570,  $M_w$ : 4290,  $D$ : 1.67

Cycle 3)  $M_n$ : 2670,  $M_w$ : 4690,  $D$ : 1.76

**Figure S23.** GPC traces of polyglycerol obtained from recycling experiments (Table 2).

## VI. Inverse-gated $^{13}\text{C}$ NMR spectra of polyglycerol

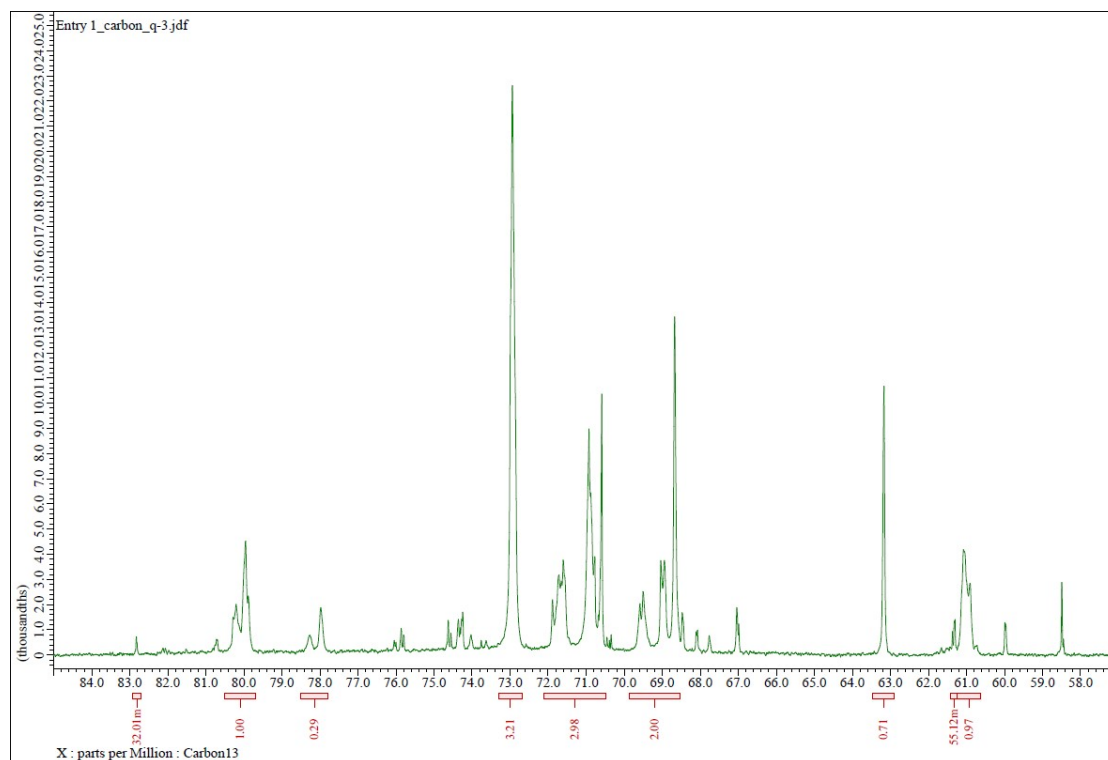

Figure S24. Inverse-gated  $^{13}\text{C}$  NMR of entry 1 (Table 1)

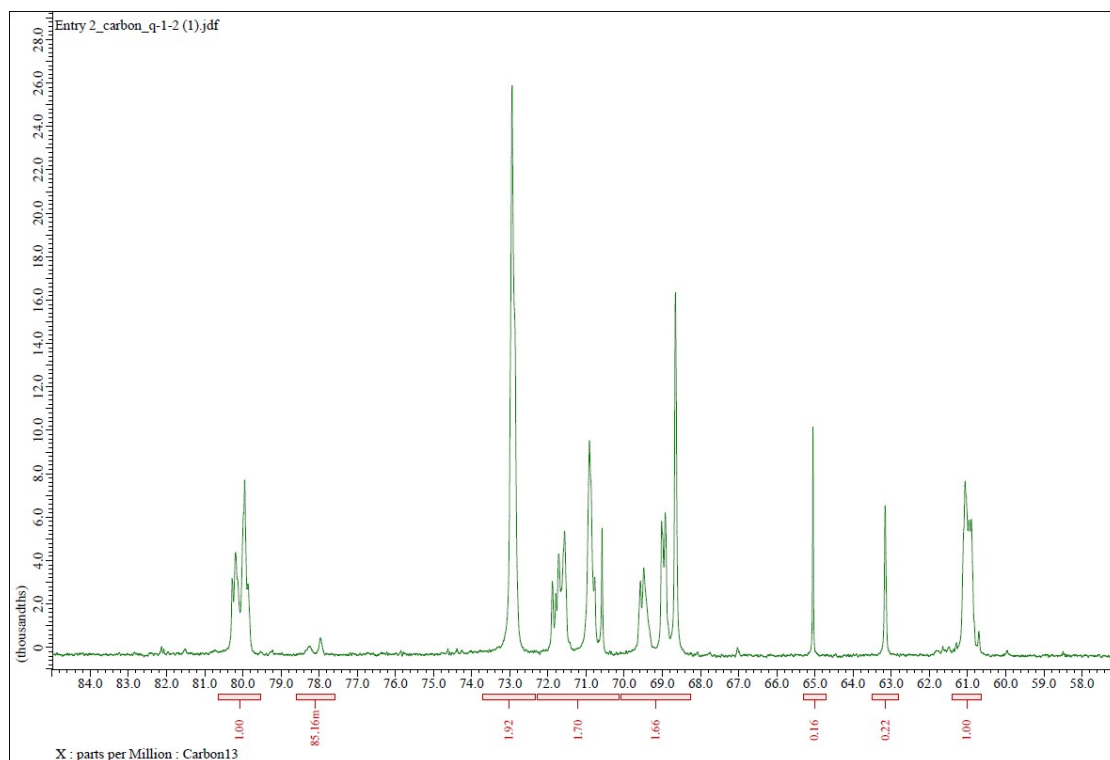

**Figure S25.** Inverse-gated  $^{13}\text{C}$  NMR of entry 2 (Table 1)

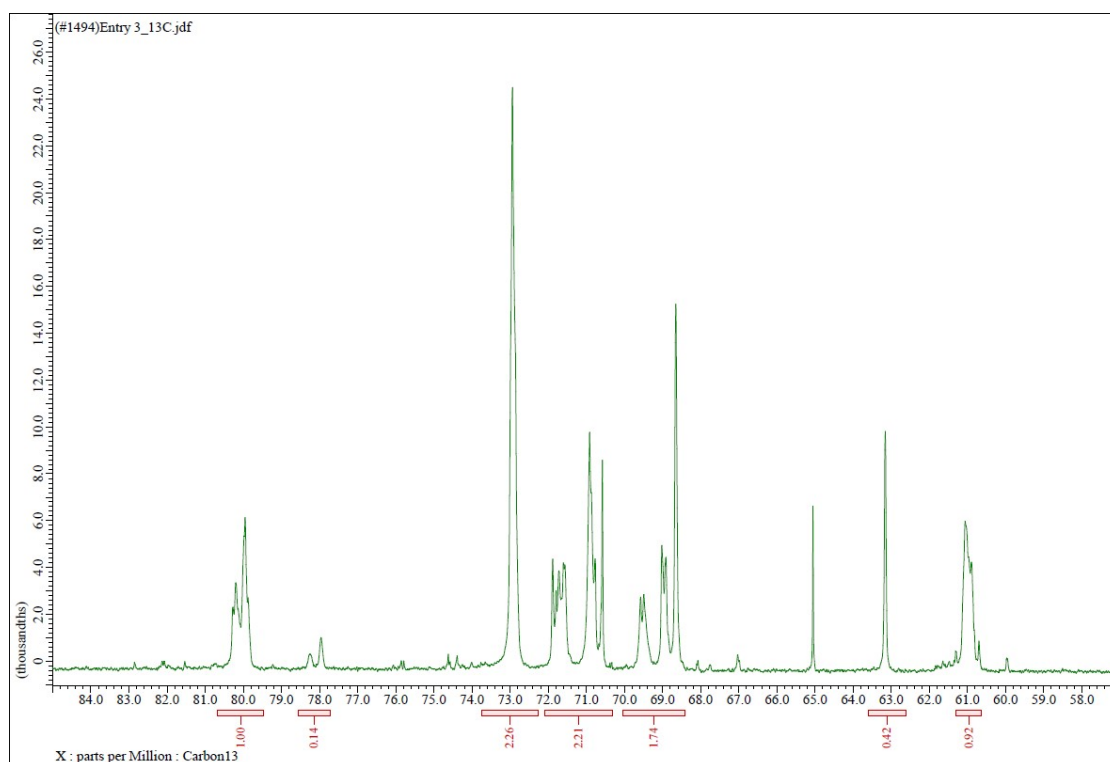

**Figure S26.** Inverse-gated  $^{13}\text{C}$  NMR of entry 3 (Table 1)

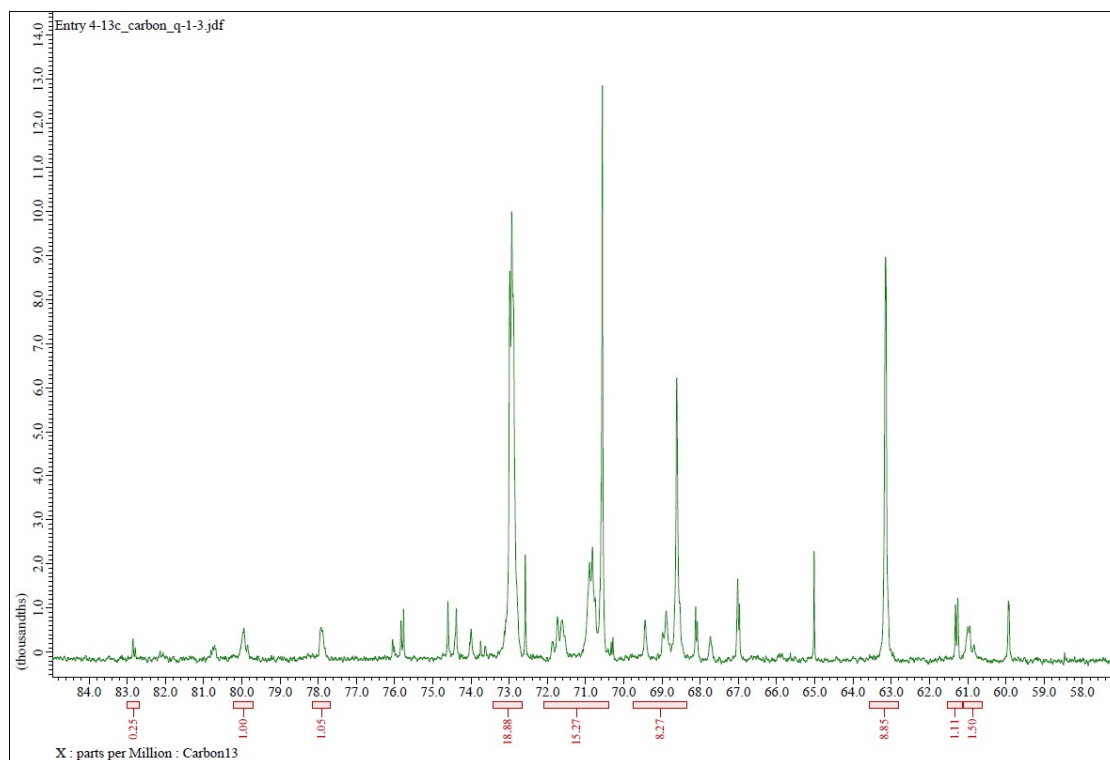

**Figure S27.** Inverse-gated  $^{13}\text{C}$  NMR of entry 4 (Table 1)

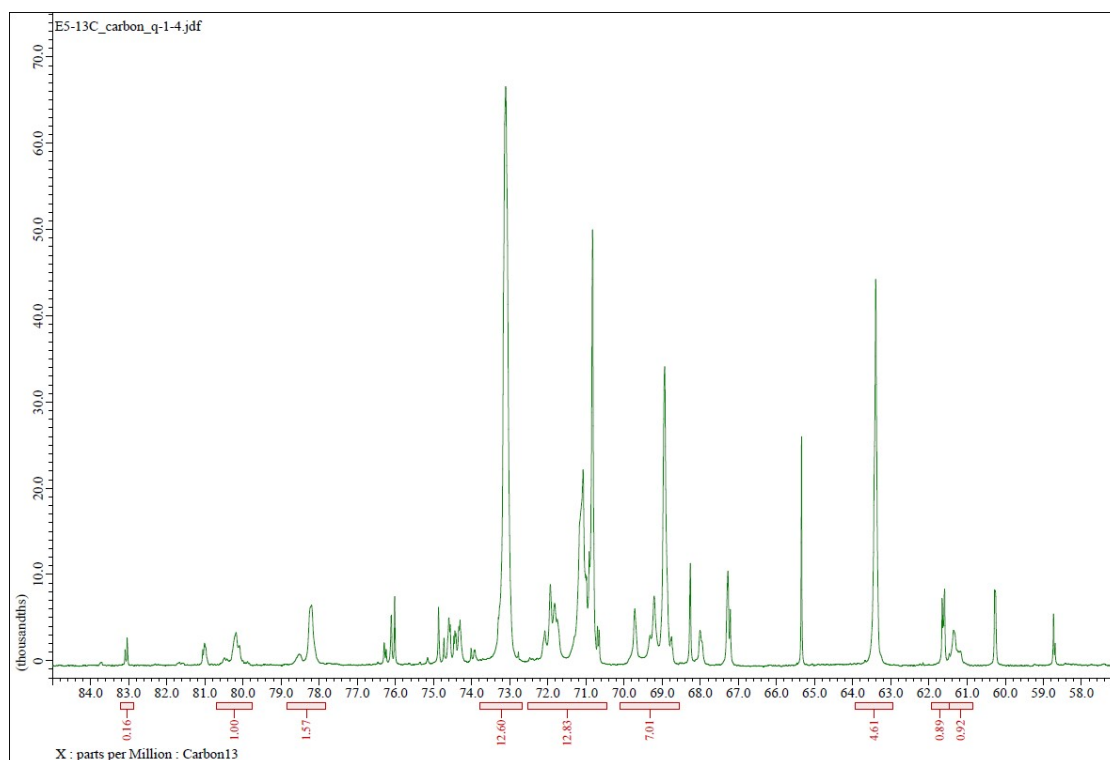

**Figure S28.** Inverse-gated  $^{13}\text{C}$  NMR of entry 5 (Table 1)

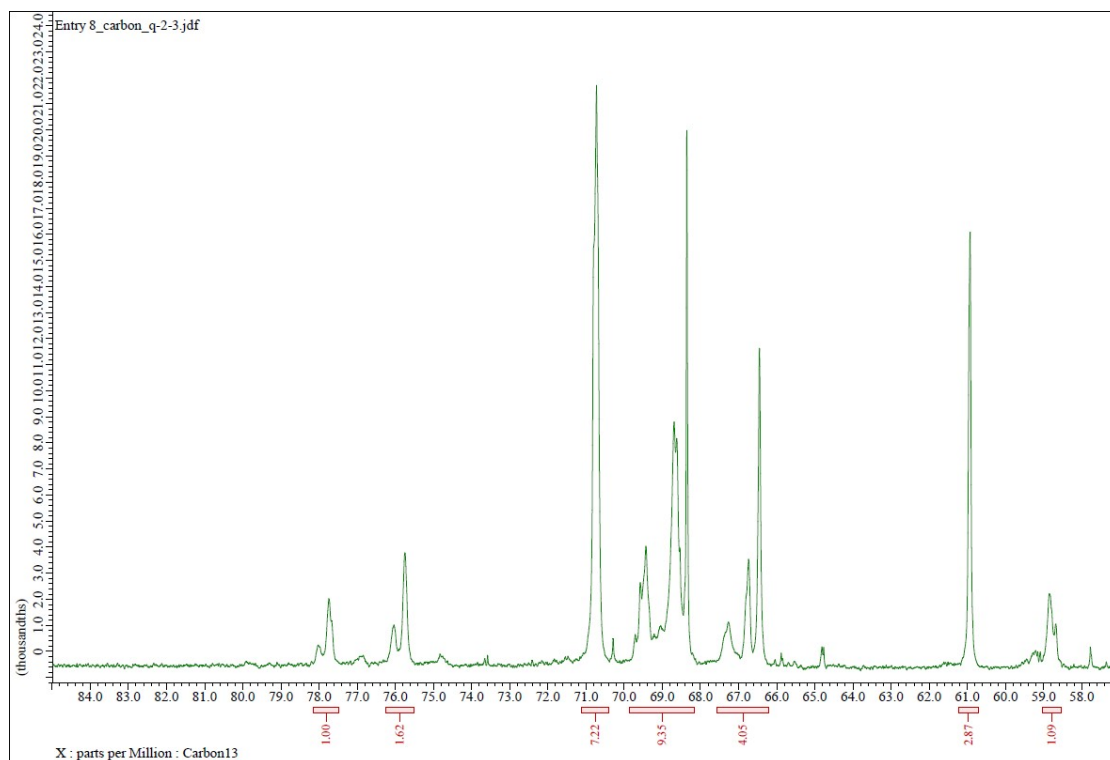

**Figure S29.** Inverse-gated  $^{13}\text{C}$  NMR of entry 8 (Table 1)

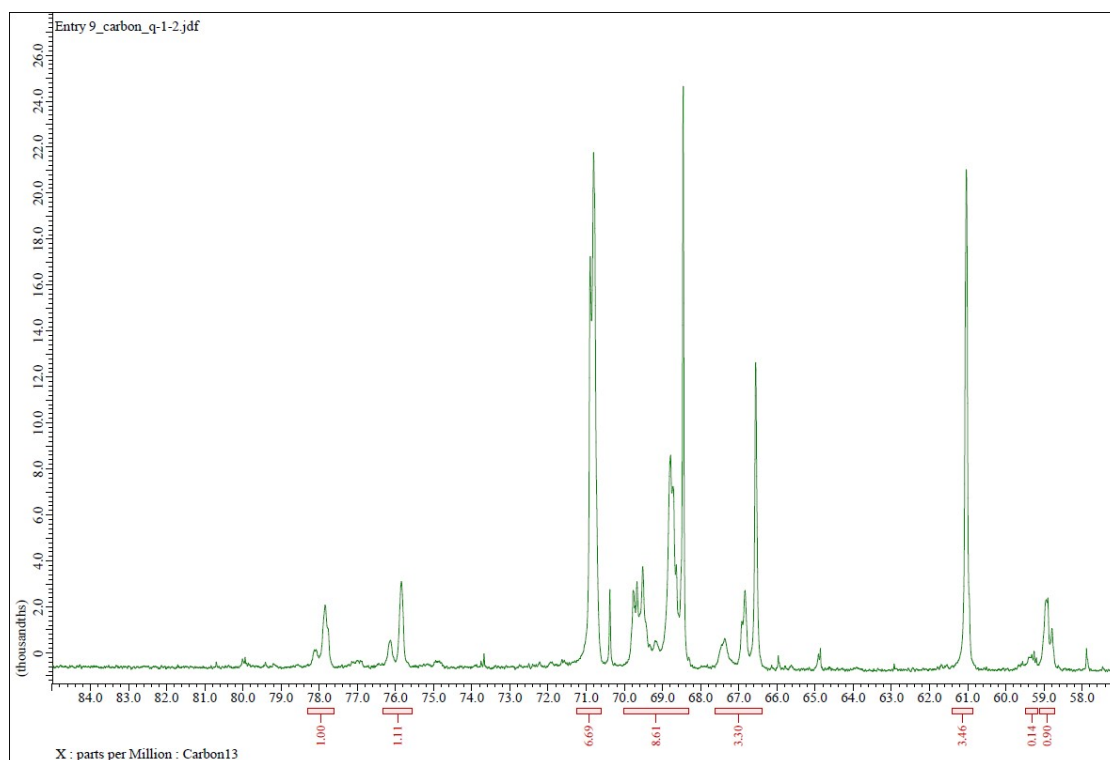

**Figure S30.** Inverse-gated  $^{13}\text{C}$  NMR of entry 9 (Table 1)

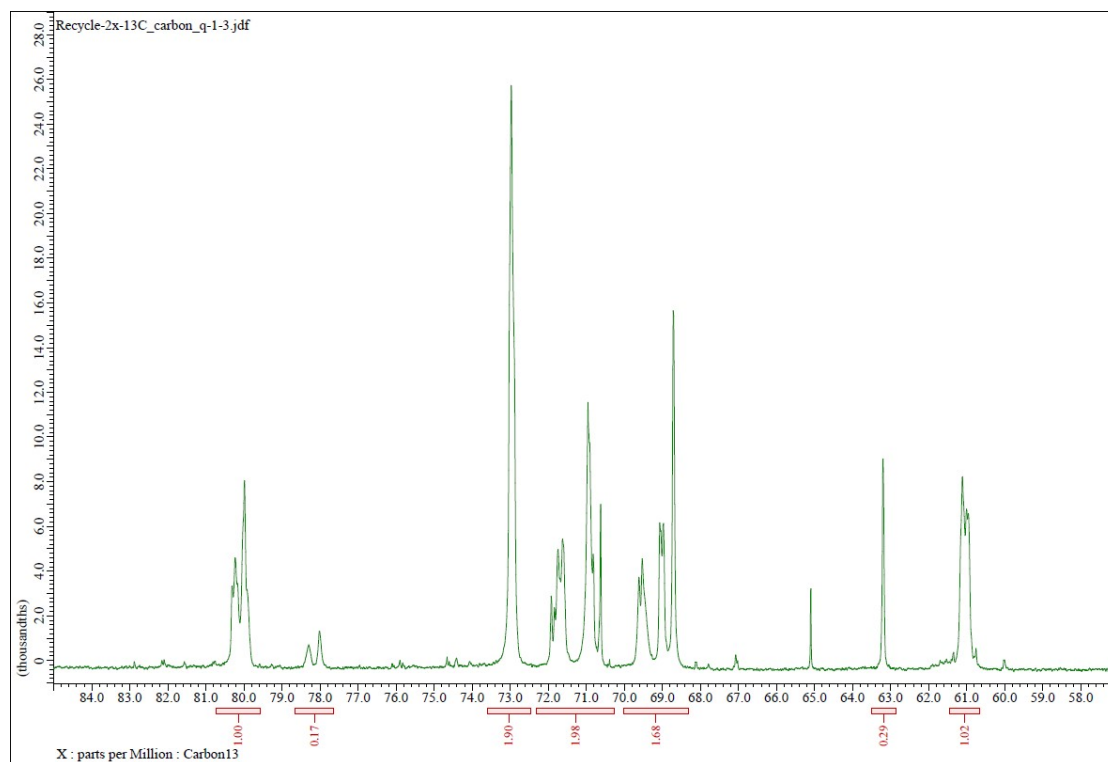

**Figure S31.** Inverse-gated  $^{13}\text{C}$  NMR of polyglycerol obtained from 2nd cycle of recycling experiments (Table 2).

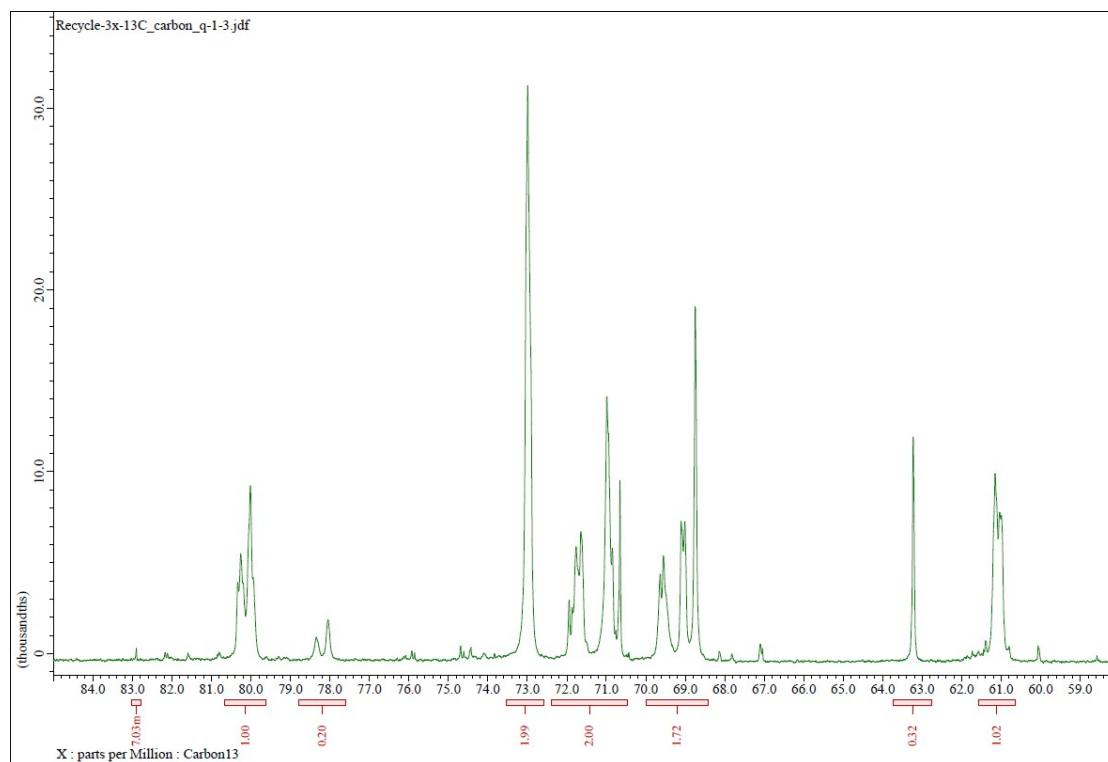

**Figure S32.** Inverse-gated  $^{13}\text{C}$  NMR of polyglycerol obtained from 3rd cycle of recycling experiments (Table 2).

## VII. Thermal analysis of polyglycerol

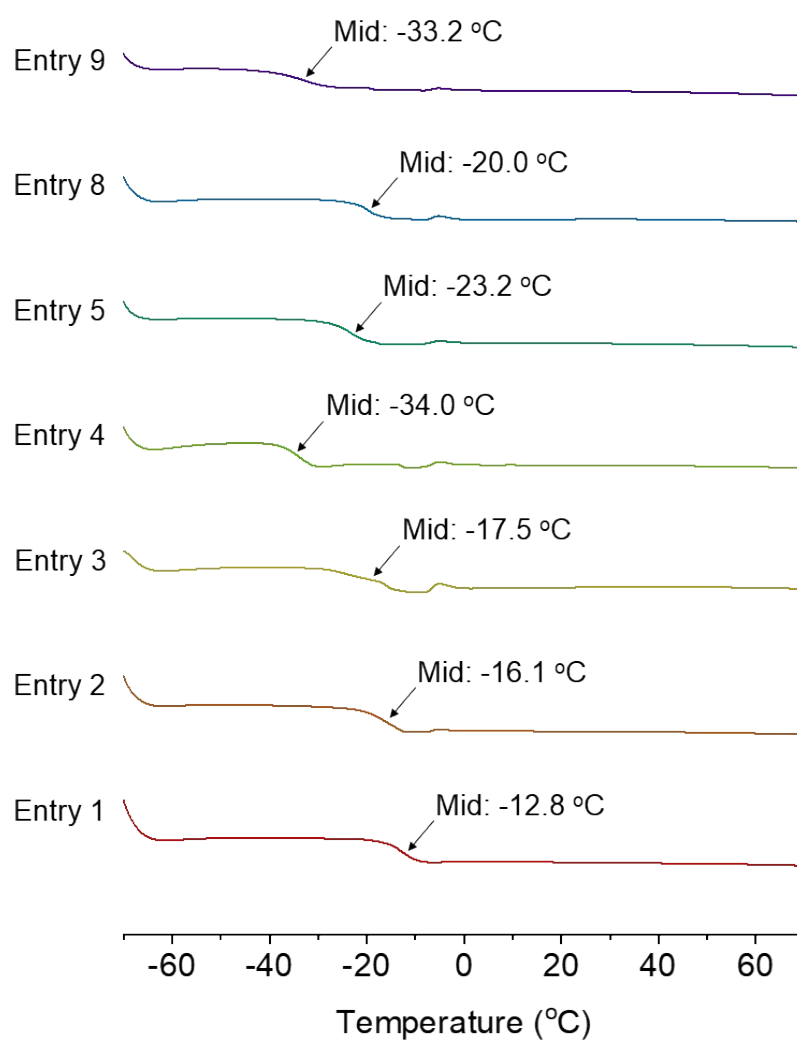

**Figure S33.** DSC curves of polyglycerol (Table 1).



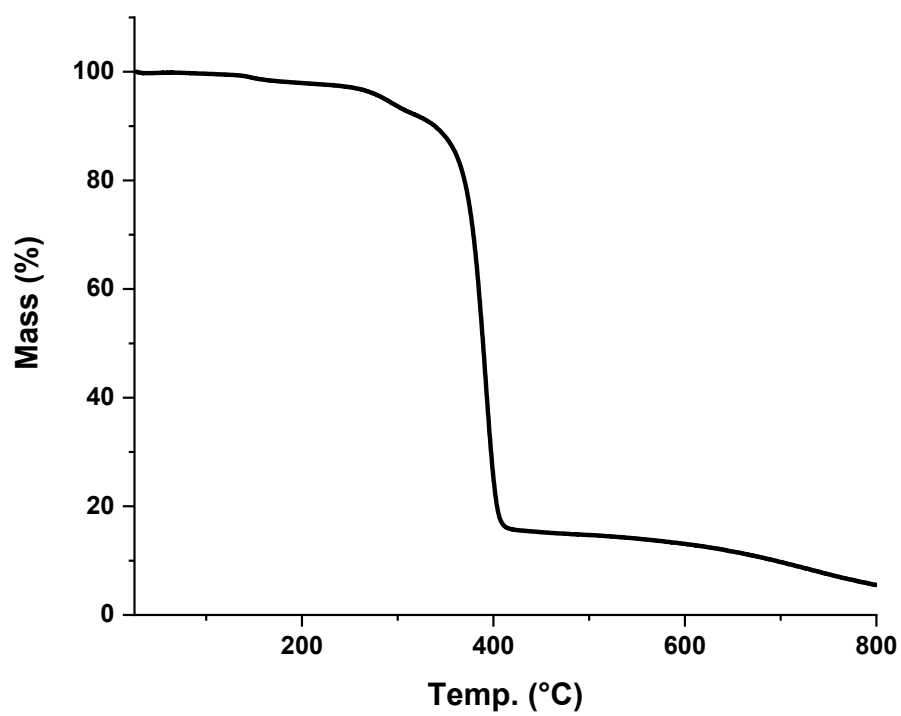

**Figure S34.** TGA curve of polyglycerol (Table 1, entry 1).

## VIII. $^1\text{H}$ NMR and ESI-MS of the reaction mixture including copper catalysts

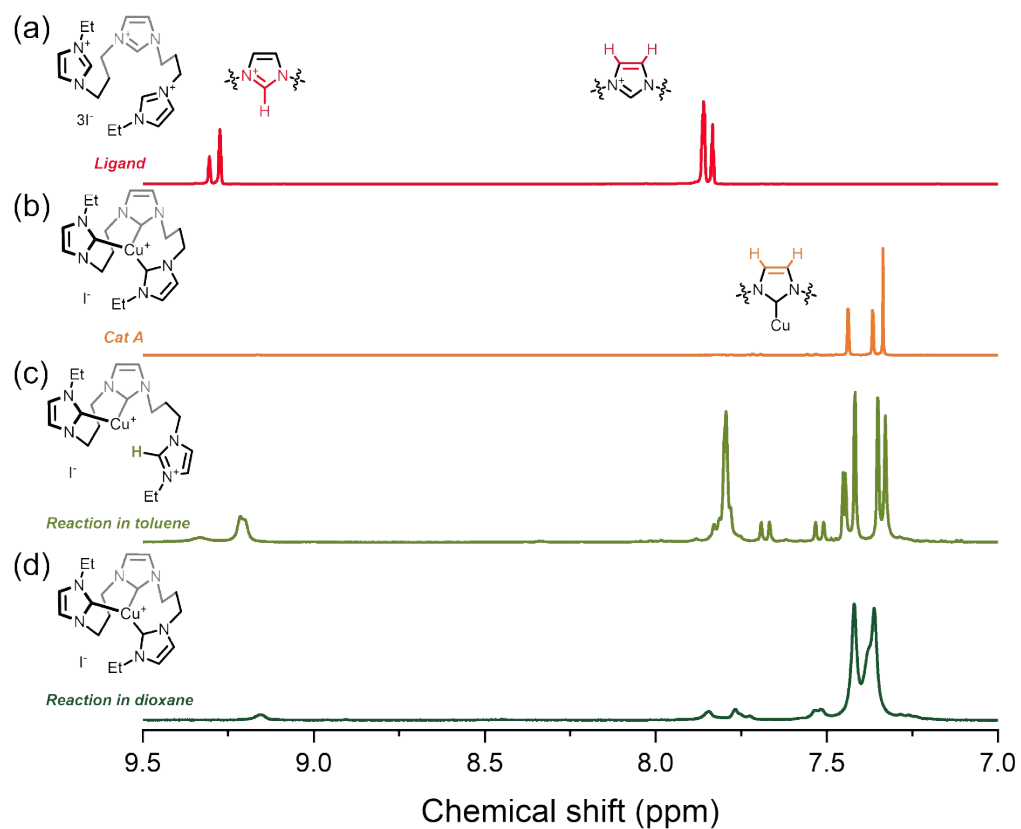

**Figure S35.**  $^1\text{H}$  NMR spectra of (a) the ligand, (b) catalyst A, (c) the reaction mixture including catalyst A and glycidol in toluene, and (d) the reaction mixture including catalyst A and glycidol in dioxane

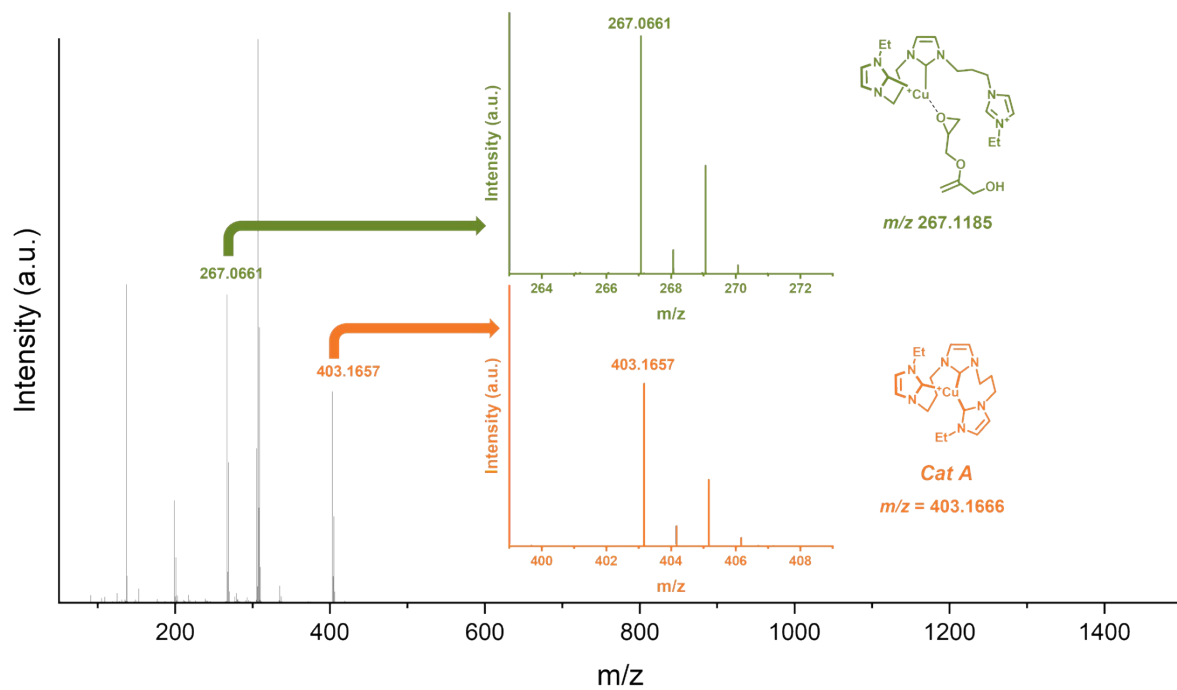

**Figure S36.** ESI-MS spectra of the reaction mixture including catalyst **A** and glycidol
